# Supplementary material for: Effect of insertion of low leakage polar layer on leakage current and multiferroic properties of BiFeO3/BaTiO3 multilayer structure
Source: Royal Society of Chemistry journal article supplement (doi:10.1039/c6ra09326d), 2016-01-01
Supplement: c6ra09326d1.pdf [file c6ra09326d1.pdf]

**Electronic supplementary information for the RSC Advances paper**

**Effect of insertion of low leakage polar layer on leakage current and multiferroic properties of BiFeO<sub>3</sub>/BaTiO<sub>3</sub> multilayer structure**

Savita Sharma<sup>1,3</sup>, Monika Tomar<sup>2</sup>, Ashok Kumar<sup>4</sup>, Nitin K. Puri<sup>3</sup> and Vinay Gupta<sup>1\*</sup>

<sup>1</sup>Department of Physics and Astrophysics, University of Delhi, Delhi, INDIA,

<sup>2</sup>Physics Department, Miranda House, University of Delhi, Delhi, INDIA,

<sup>3</sup>Department of Applied Physics, Delhi Technological University, Delhi, INDIA,

<sup>4</sup>CSIR-National Physical Laboratory, Dr. K.S .Krishnan Marg, Delhi, INDIA



**Fig. S2** C-V characteristics of  $\text{BiFeO}_3/\text{BaTiO}_3$  multilayer structure having six stacking layers.

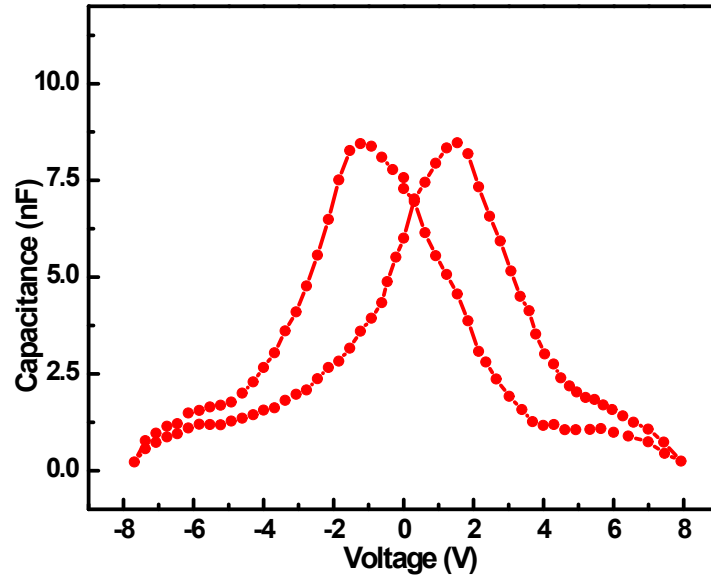

Fig. S2 represents the capacitance - voltage (C-V) characteristics of six layer  $\text{BiFeO}_3/\text{BaTiO}_3$  structure. A little asymmetry was observed in the C-V curve due to the difference in the top (Au) and bottom (Pt) electrodes.

**Table ST 1:** Lattice parameters “a” and “c”, c/a lattice distortion and stress modulus along c-axis in the **BaTiO<sub>3</sub>** and **BiFeO<sub>3</sub>** layers in **BiFeO<sub>3</sub>/BaTiO<sub>3</sub>** multilayer structures.

|                 | <b>BaTiO<sub>3</sub></b> |              |                    |                      | <b>BiFeO<sub>3</sub></b> |               |                    |                      |
|-----------------|--------------------------|--------------|--------------------|----------------------|--------------------------|---------------|--------------------|----------------------|
|                 | Lattice parameter        |              | Stress modulus (%) | c/a distortion ratio | Lattice parameter        |               | Stress modulus (%) | c/a distortion ratio |
|                 | a (Å)                    | c (Å)        |                    |                      | a (Å)                    | c (Å)         |                    |                      |
| 2 layers        | 3.985                    | 4.024        | 0.223              | 1.0097               | 5.492                    | 13.423        | 3.201              | 2.4437               |
| 3 layers        | 4.372                    | 4.061        | 0.694              | 0.9288               | 5.495                    | 13.419        | 3.230              | 2.4420               |
| 4 layers        | 4.369                    | 4.058        | 0.619              | 0.9288               | 5.530                    | 13.548        | 2.300              | 2.4499               |
| 5 layers        | 4.385                    | 4.080        | 1.165              | 0.9304               | 5.535                    | 13.530        | 2.430              | 2.4444               |
| <b>6 layers</b> | <b>4.372</b>             | <b>4.078</b> | <b>1.115</b>       | <b>0.9327</b>        | <b>5.424</b>             | <b>13.315</b> | <b>3.980</b>       | <b>2.4548</b>        |
| 7 layers        | 4.598                    | 4.095        | 1.537              | 0.8906               | 5.420                    | 13.321        | 3.937              | 2.4577               |
| Bulk            | 3.999                    | 4.033        | ---                | 1.0085               | 5.876                    | 13.867        | ---                | 2.3599               |

The lattice parameters of **BiFeO<sub>3</sub>** and **BaTiO<sub>3</sub>** in multilayer thin film structures were calculated by Le-Bail fitting using Bruker Topas 3 software. The corresponding data reported for bulk **BaTiO<sub>3</sub>** and **BiFeO<sub>3</sub>** are also included in Table ST 1 for comparison. The values of lattice parameters a and c were estimated to be 4.372 Å and 4.078 Å for **BaTiO<sub>3</sub>** and 5.424 Å and 13.315 Å for **BiFeO<sub>3</sub>** respectively for the six layered **BiFeO<sub>3</sub>/BaTiO<sub>3</sub>** system (Table ST 1). These values are slightly lower than the corresponding bulk values for **BiFeO<sub>3</sub>** and slightly greater in case of **BaTiO<sub>3</sub>** [JCPDS card No. 01-072-0138 and 01-072-2035], indicating the presence of stress in the **BiFeO<sub>3</sub>/BaTiO<sub>3</sub>** multilayer structures prepared by PLD. The stress modulus in the **BiFeO<sub>3</sub>/BaTiO<sub>3</sub>** multilayer thin film is obtained using equation: Stress = (c<sub>0</sub>-c)/c<sub>0</sub> in %, where “c” is the respective lattice constant of **BiFeO<sub>3</sub>** or **BaTiO<sub>3</sub>** in deposited multilayer structure and “c<sub>0</sub>” is the corresponding bulk value.

**Table ST 2:** Ferroelectric, ferromagnetic parameters and leakage current of  $\text{BiFeO}_3/\text{BaTiO}_3$  multilayer structures having different number of layers.

|                 | $P_r$<br>( $\mu\text{C}/\text{cm}^2$ ) | $P_s$<br>( $\mu\text{C}/\text{cm}^2$ ) | $2E_c$ (kV/cm) | Leakage<br>current (A)                  | $M_r$<br>(emu/cm <sup>3</sup> ) | $M_s$<br>(emu/cm <sup>3</sup> ) |
|-----------------|----------------------------------------|----------------------------------------|----------------|-----------------------------------------|---------------------------------|---------------------------------|
| 2 layers        | 8.29                                   | 17.92                                  | 6.06           | $1.52 \times 10^{-5}$                   | 10.33                           | 28.29                           |
| 3 layers        | 13.40                                  | 29.46                                  | 6.49           | $2.51 \times 10^{-6}$                   | 13.45                           | 37.67                           |
| 4 layers        | 29.53                                  | 49.60                                  | 6.77           | $6.38 \times 10^{-7}$                   | 21.26                           | 56.42                           |
| 5 layers        | 45.72                                  | 64.47                                  | 11.18          | $1.62 \times 10^{-7}$                   | 32.98                           | 86.88                           |
| <b>6 layers</b> | <b>72.14</b>                           | <b>99.80</b>                           | <b>10.25</b>   | <b><math>3.18 \times 10^{-8}</math></b> | <b>35.32</b>                    | <b>94.70</b>                    |
| 7 layers        | 15.96                                  | 26.25                                  | 11.11          | $5.16 \times 10^{-6}$                   | 15.79                           | 42.36                           |
